# Supplementary material for: Beyond the fish-Daphnia paradigm: testing the potential for pygmy backswimmers (Neoplea striola) to cause trophic cascades in subtropical ponds
Source: PeerJ journal article supplement (doi:10.7717/peerj.14094), 2022-09-28

### Zooplankton group

- copepods
- cladocerans + ostracods
- *Spirostomum*
- rotifers

**A**

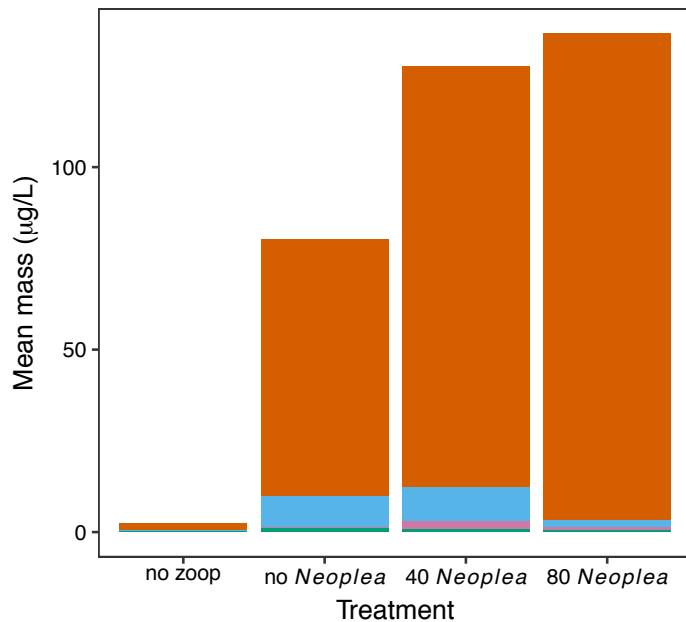

**B**

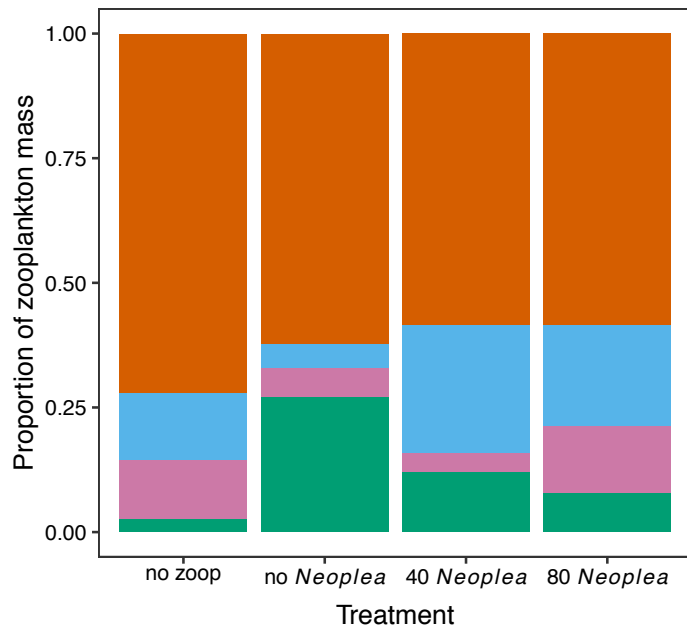

Supplement: Supplemental_Figure_S1.pdf [file Supplemental_Figure_S1.pdf]
