# Supplementary material for: Beyond the fish-Daphnia paradigm: testing the potential for pygmy backswimmers (Neoplea striola) to cause trophic cascades in subtropical ponds
Source: PeerJ journal article supplement (doi:10.7717/peerj.14094), 2022-09-28

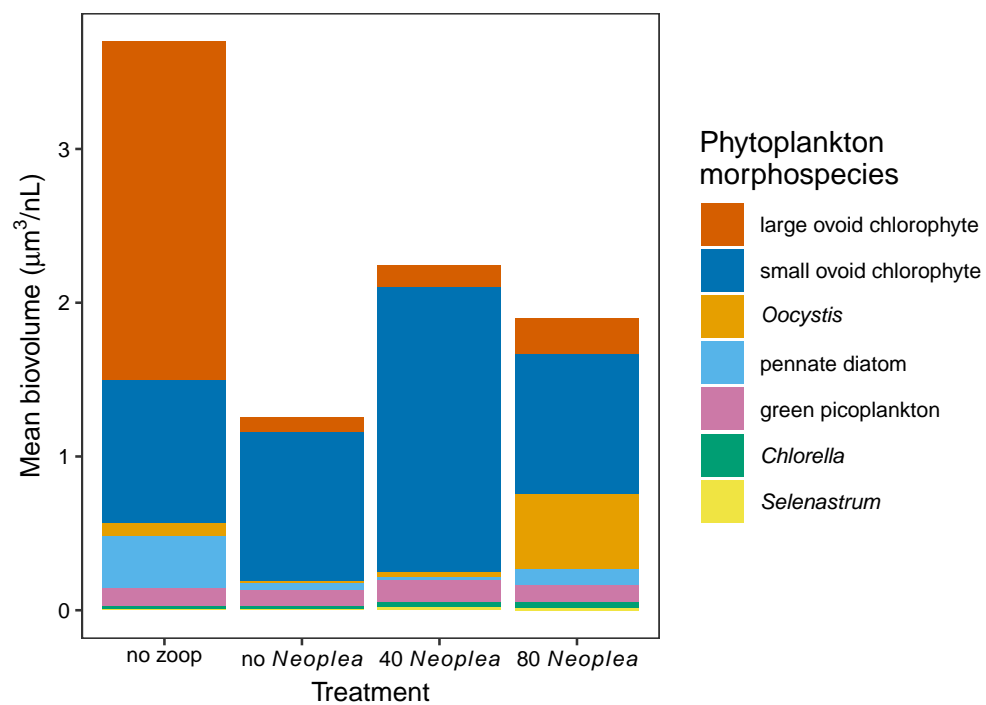

Supplement: Supplemental_Figure_S2.pdf [file Supplemental_Figure_S2.pdf]
